# Supplementary material for: Hybrid organic–inorganic supramolecular systems based on a pyridine end-decorated molybdenum(ii) halide cluster and zinc(ii) porphyrinate
Source: Royal Society of Chemistry journal article supplement (doi:10.1039/c8dt04452j), 2019-01-01
Supplement: c8dt04452j1.pdf [file c8dt04452j1.pdf]

## Electronic Supporting Information

### Hybrid organic–inorganic supramolecular system based on a pyridine end-decorated molybdenum(II) halide cluster and zinc(II) porphyrinate

Marina V. Volostnykh,<sup>a</sup> Maxim A. Mikhaylov,<sup>bc</sup> Anna. A. Sinelshchikova,<sup>a</sup> Gayane A. Kirakosyan,<sup>ad</sup> Alexander G. Martynov,<sup>a</sup> Mikhail S. Grigoriev,<sup>a</sup> Dmitry A. Piryazev,<sup>bc</sup> Aslan Yu. Tsivadze,<sup>ad</sup> Maxim N. Sokolov<sup>bc\*</sup> and Yulia G. Gorbunova<sup>ad\*</sup>

<sup>a</sup> Frumkin Institute of Physical Chemistry and Electrochemistry, Russian Academy of Sciences, Leninsky pr. 31-4, Moscow, 119071, Russia.

<sup>b</sup> Nikolaev Institute of Inorganic Chemistry, Siberian Branch of the Russian Academy of Sciences, Novosibirsk 630090, Russia.

<sup>c</sup> Novosibirsk State University, Novosibirsk 630090, Russia.

<sup>d</sup> Kurnakov Institute of General and Inorganic Chemistry, Russian Academy of Sciences, Leninsky pr. 31, Moscow, 119991, Russia.

*Email: yulia@igic.ras.ru*

### Table of contents

|                                                                                                                                                                                                                                                                         |           |
|-------------------------------------------------------------------------------------------------------------------------------------------------------------------------------------------------------------------------------------------------------------------------|-----------|
| <b>1. Characterization of (Bu<sub>4</sub>N)<sub>2</sub>[{Mo<sub>6</sub>I<sub>8</sub>}(OOC-C<sub>5</sub>H<sub>4</sub>N)<sub>6</sub>] (PyMoC).....</b>                                                                                                                    | <b>S3</b> |
| Fig. S1 <sup>1</sup> H NMR spectra (C <sub>3</sub> D <sub>6</sub> O, 25°C) of (Bu <sub>4</sub> N) <sub>2</sub> [{Mo <sub>6</sub> I <sub>8</sub> }(OOC-C <sub>5</sub> H <sub>4</sub> N) <sub>6</sub> ]. .....                                                            | S3        |
| Fig. S2 <sup>13</sup> C NMR spectra (C <sub>3</sub> D <sub>6</sub> O, 25°C) of (Bu <sub>4</sub> N) <sub>2</sub> [{Mo <sub>6</sub> I <sub>8</sub> }(OOC-C <sub>5</sub> H <sub>4</sub> N) <sub>6</sub> ] (above) and free isonicotinic acid (bottom). .....               | S3        |
| <b>2. X-ray structural analysis .....</b>                                                                                                                                                                                                                               | <b>S4</b> |
| <b>2.1. XRD of PyMoC .....</b>                                                                                                                                                                                                                                          | <b>S4</b> |
| Table S1 Crystal data and structure refinement for (Bu <sub>4</sub> N) <sub>2</sub> [{Mo <sub>6</sub> I <sub>8</sub> }(OOC-C <sub>5</sub> H <sub>4</sub> N) <sub>6</sub> ] .....                                                                                        | S4        |
| Table S2 Selected bond distances (Å) in (Bu <sub>4</sub> N) <sub>2</sub> [{Mo <sub>6</sub> I <sub>8</sub> }(OOC-C <sub>5</sub> H <sub>4</sub> N) <sub>6</sub> ].....                                                                                                    | S4        |
| Fig. S3 Cluster anion [{Mo <sub>6</sub> I <sub>8</sub> }(OOC-C <sub>5</sub> H <sub>4</sub> N) <sub>6</sub> ] <sup>2-</sup> , ellipsoids at 50% probability level.....                                                                                                   | S5        |
| <b>2.2. XRD of ZnDTolP.....</b>                                                                                                                                                                                                                                         | <b>S5</b> |
| Table S3 Crystal data and structure refinement for <b>ZnDTolP</b> .....                                                                                                                                                                                                 | S5        |
| Fig. S4 ORTEP drawing of <b>ZnDTolP</b> . Thermal ellipsoids are at the 50% probability level. ....                                                                                                                                                                     | S6        |
| Table S4 Selected bond distances (Å) in <b>ZnDTolP</b> .....                                                                                                                                                                                                            | S6        |
| <b>2.3. XRD of CP<sub>2</sub> and CP<sub>6</sub>.....</b>                                                                                                                                                                                                               | <b>S7</b> |
| Table S5 Crystal data and structure refinement for <b>CP<sub>2</sub></b> and <b>CP<sub>6</sub></b> .....                                                                                                                                                                | S7        |
| Fig. S5 ORTEP drawing of asymmetric unit of <b>CP<sub>2</sub></b> . Thermal ellipsoids are at the 50% probability level. Hydrogen atoms are omitted for clarity. C atoms are marked by blue, N by magenta, O by red, Cl and I by green, Zn by dark-red, Mo by grey..... | S8        |

|                                                                                                                                                                                                                                                                                                                                                                                                                                                                               |            |
|-------------------------------------------------------------------------------------------------------------------------------------------------------------------------------------------------------------------------------------------------------------------------------------------------------------------------------------------------------------------------------------------------------------------------------------------------------------------------------|------------|
| Fig. S6 Packing of <b>CP<sub>2</sub></b> . Hydrogen atoms and solvent molecules CH <sub>2</sub> Cl <sub>2</sub> are omitted for clarity. Ellipsoids are at the 50% probability level. ....                                                                                                                                                                                                                                                                                    | S9         |
| Fig. S7 ORTEP drawing of <b>CP<sub>6</sub></b> . Thermal ellipsoids are at the 30% probability level. Hydrogen atoms are omitted for clarity. C atoms are marked by blue, N by magenta, O by red, Cl and I by green, Zn by dark-red, Mo by grey. ....                                                                                                                                                                                                                         | S9         |
| Fig. S8 ORTEP drawing of asymmetric unit of <b>CP<sub>6</sub></b> . Thermal ellipsoids are at the 30% probability level. Hydrogen atoms are omitted for clarity. C atoms are marked by blue, N by magenta, O by red, Cl and I by green, Zn by dark-red, Mo by grey. ....                                                                                                                                                                                                      | S10        |
| Table S6 Geometry of Mo cluster complexes. ....                                                                                                                                                                                                                                                                                                                                                                                                                               | S10        |
| Table S7 Selected bond lengths (Å) and angles (°) for the hybrid supramolecular complexes <b>CP<sub>n</sub></b> . ....                                                                                                                                                                                                                                                                                                                                                        | S10        |
| <b>3. Powder X-ray diffraction analysis (PXRD) .....</b>                                                                                                                                                                                                                                                                                                                                                                                                                      | <b>S12</b> |
| Fig. S9 PXRD pattern of <b>CP<sub>2</sub></b> -bulk. ....                                                                                                                                                                                                                                                                                                                                                                                                                     | S12        |
| Fig. S10 PXRD pattern of <b>CP<sub>6</sub></b> -bulk. ....                                                                                                                                                                                                                                                                                                                                                                                                                    | S13        |
| <b>4. NMR spectroscopy .....</b>                                                                                                                                                                                                                                                                                                                                                                                                                                              | <b>S14</b> |
| <b>4.1. DOSY Experiments.....</b>                                                                                                                                                                                                                                                                                                                                                                                                                                             | <b>S14</b> |
| Fig. S11 DOSY <sup>1</sup> H NMR spectra (in CDCl <sub>3</sub> at 303 K) of <b>ZnDTolP</b> , <b>PyMoC</b> and their mixtures at different molar ratios (C : P = 1:2 – 1:10): (A) the porphyrin spectral range and (B) the range of the N-CH <sub>2</sub> group of Bu <sub>4</sub> N <sup>+</sup> (see Fig. 4). ....                                                                                                                                                           | S14        |
| Table S8 (Left) Experimental diffusion coefficients ( <i>D</i> s) of <b>ZnDTolP</b> , <b>PyMoC</b> and their mixtures at different molar ratios (C : P = 1:2 – 1:10) according DOSY-NMR data. (Right) Changes of <i>D</i> s at the different molar ratios (C : P = 1:2 – 1:10) in CDCl <sub>3</sub> . ....                                                                                                                                                                    | S15        |
| <b>4.2. Low-temperature NMR Experiments.....</b>                                                                                                                                                                                                                                                                                                                                                                                                                              | <b>S15</b> |
| Fig. S12 Low-temperature <sup>1</sup> H NMR spectra (in CDCl <sub>3</sub> at 233 K) of mixtures of <b>ZnDTolP</b> and <b>PyMoC</b> at different cluster : porphyrin molar ratios (C : P = 1:2 – 1:6). ....                                                                                                                                                                                                                                                                    | S15        |
| <b>5. UV-Vis spectroscopy .....</b>                                                                                                                                                                                                                                                                                                                                                                                                                                           | <b>S16</b> |
| Fig. S13 (A) UV-Vis spectral changes at 298 K of <b>ZnDTolP</b> (90 μM) in CH <sub>2</sub> Cl <sub>2</sub> upon titration with <b>PyMoC</b> solution (0.034 equiv each addition). (B) Species concentration plot of <b>ZnDTolP</b> (black), hybrid complex <b>CP<sub>2</sub></b> (aquamarine) and hybrid complex <b>CP<sub>6</sub></b> (blue) upon the addition of <b>PyMoC</b> . (C) Absorbance changes of <b>ZnDTolP</b> at 537 nm upon the addition of <b>PyMoC</b> . .... | S16        |

## 1. Characterization of $(\text{Bu}_4\text{N})_2[\{\text{Mo}_6\text{I}_8\}(\text{OOC}-\text{C}_5\text{H}_4\text{N})_6]$ (PyMoC)

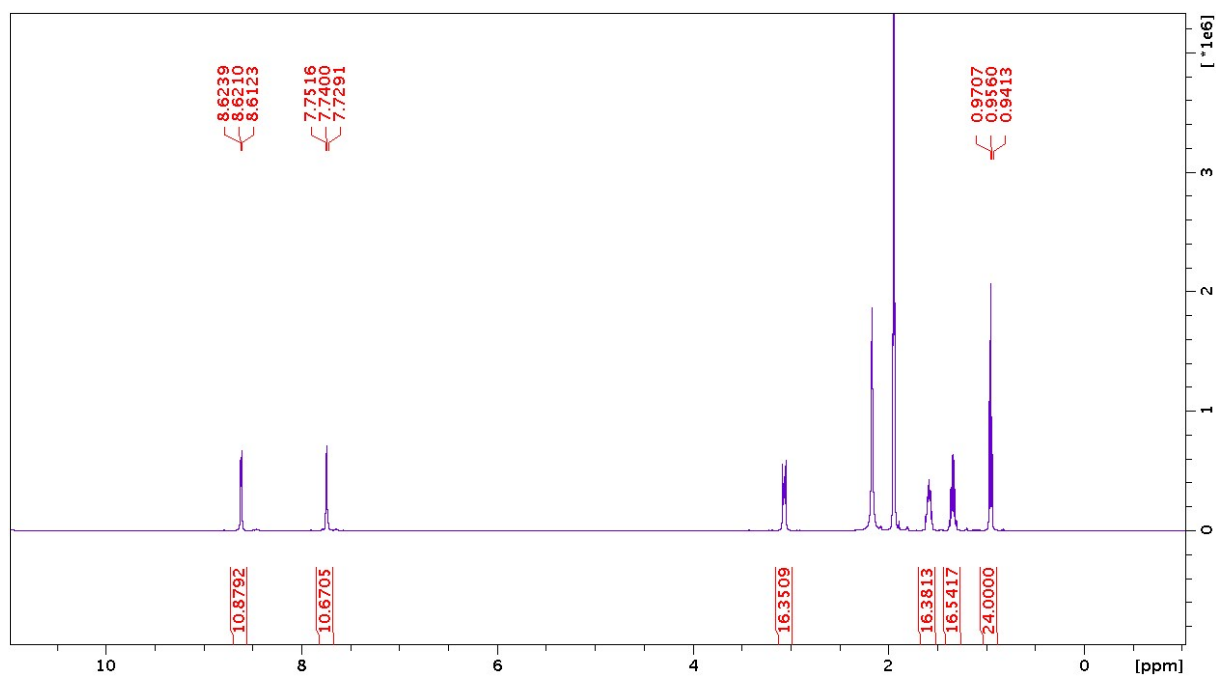

Fig. S1  $^1\text{H}$  NMR spectra ( $\text{C}_3\text{D}_6\text{O}$ ,  $25^\circ\text{C}$ ) of  $(\text{Bu}_4\text{N})_2[\{\text{Mo}_6\text{I}_8\}(\text{OOC}-\text{C}_5\text{H}_4\text{N})_6]$ .

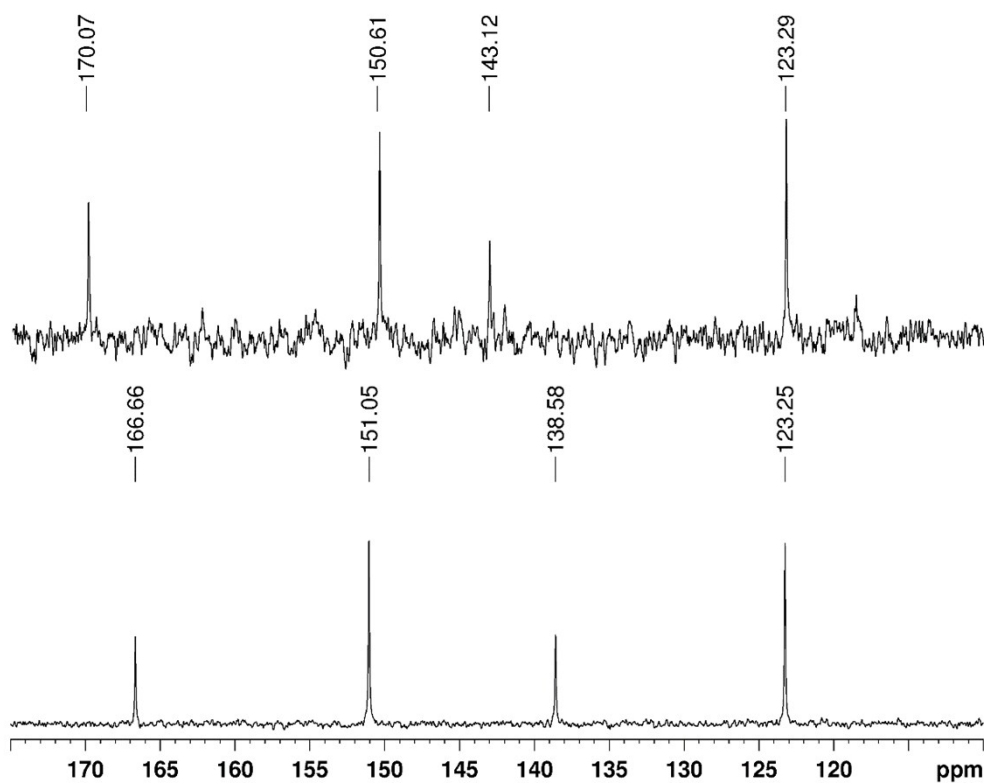

Fig. S2  $^{13}\text{C}$  NMR spectra ( $\text{C}_3\text{D}_6\text{O}$ ,  $25^\circ\text{C}$ ) of  $(\text{Bu}_4\text{N})_2[\{\text{Mo}_6\text{I}_8\}(\text{OOC}-\text{C}_5\text{H}_4\text{N})_6]$  (above) and free isonicotinic acid (bottom).

## 2. X-ray structural analysis

### 2.1. XRD of PyMoC

Table S1 Crystal data and structure refinement for  $(\text{Bu}_4\text{N})_2[\{\text{Mo}_6\text{I}_8\}(\text{OOC-C}_5\text{H}_4\text{N})_6]$

|                                            |                                                                       |
|--------------------------------------------|-----------------------------------------------------------------------|
| CCDC deposition code                       | 1834666                                                               |
| Empirical formula                          | $\text{C}_{34}\text{H}_{48}\text{N}_4\text{O}_6\text{Mo}_3\text{I}_4$ |
| FW                                         | 1404.18                                                               |
| Temperature, K                             | 150.0(2)                                                              |
| Crystal system                             | triclinic                                                             |
| Space group                                | P-1                                                                   |
| a, Å                                       | 10.5010(8)                                                            |
| b, Å                                       | 13.9062(11)                                                           |
| c, Å                                       | 16.2223(13)                                                           |
| $\alpha$ , °                               | 113.400(2)                                                            |
| $\beta$ , °                                | 93.501(2)                                                             |
| $\gamma$ , °                               | 97.357(2)                                                             |
| Volume, Å <sup>3</sup>                     | 2139.8(3)                                                             |
| Z                                          | 2                                                                     |
| $\rho_{\text{calc}}$ g/cm <sup>3</sup>     | 2.179                                                                 |
| $\mu$ , mm <sup>-1</sup>                   | 3.796                                                                 |
| F(000)                                     | 1332.0                                                                |
| Crystal size, mm <sup>3</sup>              | 0.364 × 0.162 × 0.126                                                 |
| Radiation                                  | MoK $\alpha$ ( $\lambda = 0.71073$ )                                  |
| 2 $\theta$ range for data collection, °    | 3.236 to 66.038                                                       |
| Index ranges                               | -15 ≤ h ≤ 15, -21 ≤ k ≤ 13, -17 ≤ l ≤ 24                              |
| Reflections collected                      | 36120                                                                 |
| Independent reflections                    | 14578 [ $R_{\text{int}} = 0.0203$ , $R_{\text{sigma}} = 0.0255$ ]     |
| Data/restraints/parameters                 | 14578/0/464                                                           |
| Goodness-of-fit on F <sup>2</sup>          | 1.038                                                                 |
| Final R indexes [ $I \geq 2\sigma(I)$ ]    | $R_1 = 0.0347$ , $wR_2 = 0.0842$                                      |
| Final R indexes [all data]                 | $R_1 = 0.0469$ , $wR_2 = 0.0923$                                      |
| Largest diff. peak/hole, e Å <sup>-3</sup> | 4.15/-2.01                                                            |

Table S2 Selected bond distances (Å) in  $(\text{Bu}_4\text{N})_2[\{\text{Mo}_6\text{I}_8\}(\text{OOC-C}_5\text{H}_4\text{N})_6]$ .

|      |                    |           |
|------|--------------------|-----------|
| I(1) | Mo(1)              | 2.7630(4) |
| I(1) | Mo(2)              | 2.7826(4) |
| I(1) | Mo(3) <sup>1</sup> | 2.7742(4) |
| I(2) | Mo(1)              | 2.7689(4) |
| I(2) | Mo(2)              | 2.7901(4) |
| I(2) | Mo(3)              | 2.7857(4) |
| I(3) | Mo(1)              | 2.7633(4) |
| I(3) | Mo(2) <sup>1</sup> | 2.7765(4) |
| I(3) | Mo(3)              | 2.7716(4) |

|       |                    |           |
|-------|--------------------|-----------|
| I(4)  | Mo(1)              | 2.8046(4) |
| I(4)  | Mo(2) <sup>1</sup> | 2.7930(4) |
| I(4)  | Mo(3) <sup>1</sup> | 2.8067(4) |
| Mo(1) | Mo(2) <sup>1</sup> | 2.6652(4) |
| Mo(1) | Mo(2)              | 2.6743(4) |
| Mo(1) | Mo(3)              | 2.6676(4) |
| Mo(1) | Mo(3) <sup>1</sup> | 2.6737(4) |
| Mo(1) | O(1A)              | 2.119(3)  |
| Mo(2) | I(3) <sup>1</sup>  | 2.7765(4) |
| Mo(2) | I(4) <sup>1</sup>  | 2.7929(4) |
| Mo(2) | Mo(1) <sup>1</sup> | 2.6652(4) |
| Mo(2) | Mo(3)              | 2.6698(4) |
| Mo(2) | Mo(3) <sup>1</sup> | 2.6719(4) |
| Mo(2) | O(1B)              | 2.168(3)  |
| Mo(3) | I(1) <sup>1</sup>  | 2.7742(4) |
| Mo(3) | I(4) <sup>1</sup>  | 2.8067(4) |
| Mo(3) | Mo(1) <sup>1</sup> | 2.6738(4) |
| Mo(3) | Mo(2) <sup>1</sup> | 2.6719(4) |
| Mo(3) | O(1C)              | 2.144(2)  |

<sup>1</sup>1-X,-Y,-Z

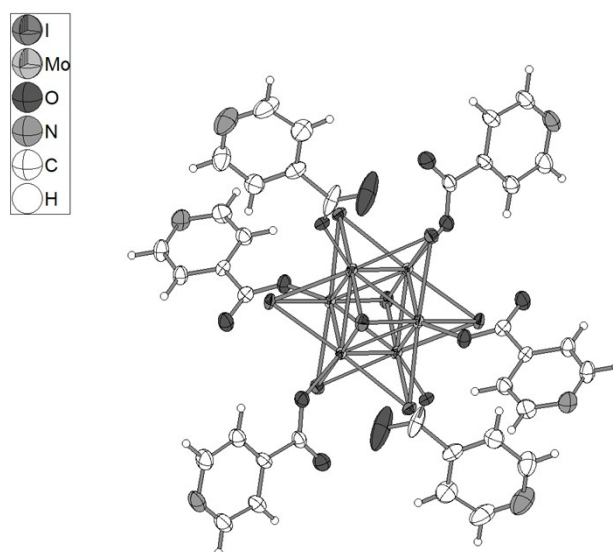

Fig. S3 Cluster anion  $[\{Mo_6I_8\}(OOC-C_5H_4N)_6]^{2-}$ , ellipsoids at 50% probability level.

## 2.2. XRD of ZnDTolP

Table S3 Crystal data and structure refinement for **ZnDTolP**

|                      |                                                   |
|----------------------|---------------------------------------------------|
| CCDC deposition code | 1843802                                           |
| Empirical formula    | C <sub>34</sub> H <sub>24</sub> N <sub>4</sub> Zn |
| FW                   | 553.94                                            |
| Temperature, K       | 100.15                                            |
| Crystal system       | monoclinic                                        |

|                                            |                                                               |
|--------------------------------------------|---------------------------------------------------------------|
| Space group                                | P2 <sub>1</sub> /c                                            |
| a, Å                                       | 14.9605(15)                                                   |
| b, Å                                       | 9.7595(11)                                                    |
| c, Å                                       | 8.5421(9)                                                     |
| α, °                                       | 90                                                            |
| β, °                                       | 93.363(6)                                                     |
| γ, °                                       | 90                                                            |
| Volume, Å <sup>3</sup>                     | 1245.1(2)                                                     |
| Z                                          | 2                                                             |
| ρ <sub>calc</sub> g/cm <sup>3</sup>        | 1.478                                                         |
| μ, mm <sup>-1</sup>                        | 1.019                                                         |
| F(000)                                     | 572.0                                                         |
| Crystal size, mm <sup>3</sup>              | 0.5 × 0.5 × 0.05                                              |
| Radiation                                  | MoKα (λ = 0.71073)                                            |
| 2θ range for data collection, °            | 8.186 to 56.09                                                |
| Index ranges                               | -19 ≤ h ≤ 19, -12 ≤ k ≤ 12, -10 ≤ l ≤ 11                      |
| Reflections collected                      | 12363                                                         |
| Independent reflections                    | 2980 [R <sub>int</sub> = 0.0757, R <sub>sigma</sub> = 0.0709] |
| Data/restraints/parameters                 | 2980/90/181                                                   |
| Goodness-of-fit on F <sup>2</sup>          | 1.074                                                         |
| Final R indexes [I >= 2σ (I)]              | R <sub>1</sub> = 0.0713, wR <sub>2</sub> = 0.1641             |
| Final R indexes [all data]                 | R <sub>1</sub> = 0.0920, wR <sub>2</sub> = 0.1751             |
| Largest diff. peak/hole, e Å <sup>-3</sup> | 1.24/-0.76                                                    |

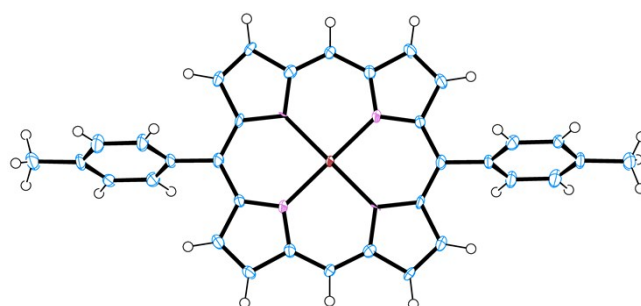

Fig. S4 ORTEP drawing of **ZnDTolP**. Thermal ellipsoids are at the 50% probability level.

Table S4 Selected bond distances (Å) in **ZnDTolP**.

|     |                 |          |
|-----|-----------------|----------|
| Zn1 | N1              | 2.032(4) |
| Zn1 | N1 <sup>1</sup> | 2.032(4) |
| Zn1 | N2 <sup>1</sup> | 2.011(4) |
| Zn1 | N2              | 2.011(4) |
| N1  | C1              | 1.369(6) |
| N1  | C4              | 1.378(6) |
| N2  | C6              | 1.374(6) |

|     |                  |           |
|-----|------------------|-----------|
| N2  | C9               | 1.411(6)  |
| C1  | C2               | 1.436(7)  |
| C1  | C10 <sup>1</sup> | 1.418(7)  |
| C2  | C3               | 1.354(8)  |
| C3  | C4               | 1.441(7)  |
| C4  | C5               | 1.386(7)  |
| C5  | C6               | 1.387(7)  |
| C6  | C7               | 1.441(7)  |
| C7  | C8               | 1.363(7)  |
| C8  | C9               | 1.451(7)  |
| C9  | C10              | 1.403(7)  |
| C10 | C1 <sup>1</sup>  | 1.418(7)  |
| C10 | C11              | 1.488(7)  |
| C11 | C12              | 1.390(9)  |
| C11 | C16              | 1.390(9)  |
| C12 | C13              | 1.389(7)  |
| C13 | C14              | 1.396(10) |
| C14 | C15              | 1.391(10) |
| C14 | C17              | 1.523(8)  |
| C15 | C16              | 1.399(7)  |

<sup>1</sup>1-x,1-y,-z

### 2.3. XRD of CP<sub>2</sub> and CP<sub>6</sub>

Table S5 Crystal data and structure refinement for CP<sub>2</sub> and CP<sub>6</sub>.

| Parameter                                                  | CP <sub>2</sub>                                                                                                                                                                                | CP <sub>6</sub> _sq                                                                                                                                                                                                                                                                           |
|------------------------------------------------------------|------------------------------------------------------------------------------------------------------------------------------------------------------------------------------------------------|-----------------------------------------------------------------------------------------------------------------------------------------------------------------------------------------------------------------------------------------------------------------------------------------------|
| CCDC deposition code                                       | 1843800                                                                                                                                                                                        | 1843801                                                                                                                                                                                                                                                                                       |
| Chemical formula                                           | C <sub>140</sub> H <sub>152</sub> Cl <sub>8</sub> I <sub>8</sub> Mo <sub>6</sub> N <sub>16</sub> O <sub>12</sub> Zn <sub>2</sub>                                                               | C <sub>368</sub> H <sub>356</sub> Cl <sub>8</sub> I <sub>8</sub> Mo <sub>6</sub> N <sub>40</sub> O <sub>14</sub> Zn <sub>8</sub>                                                                                                                                                              |
| Chemical formula moiety                                    | C <sub>104</sub> H <sub>72</sub> I <sub>8</sub> Mo <sub>6</sub> N <sub>14</sub> O <sub>12</sub> Zn <sub>2</sub> ,<br>2(C <sub>16</sub> H <sub>36</sub> N), 4(CH <sub>2</sub> Cl <sub>2</sub> ) | C <sub>240</sub> H <sub>168</sub> I <sub>8</sub> Mo <sub>6</sub> N <sub>30</sub> O <sub>12</sub> Zn <sub>6</sub> ,<br>2(C <sub>34</sub> H <sub>26</sub> N <sub>4</sub> OZn), 2(C <sub>16</sub> H <sub>36</sub> N),<br>4(CH <sub>2</sub> Cl <sub>2</sub> ), 4(C <sub>6</sub> H <sub>14</sub> ) |
| FW                                                         | 4255.95                                                                                                                                                                                        | 7960.31                                                                                                                                                                                                                                                                                       |
| Temperature, K                                             | 100(2)                                                                                                                                                                                         | 100(2)                                                                                                                                                                                                                                                                                        |
| Crystal system, space group                                | Monoclinic, <i>P</i> 2 <sub>1</sub> / <i>c</i>                                                                                                                                                 | Triclinic, <i>P</i> -1                                                                                                                                                                                                                                                                        |
| Unit cell dimensions<br><i>a</i> , <i>b</i> , <i>c</i> , Å | 11.9029(7), 21.0461(13),<br>29.4339(19)                                                                                                                                                        | 20.2530(10), 20.5959(11),<br>21.6995(10)                                                                                                                                                                                                                                                      |
| α, β, γ, °                                                 | 90, 91.286(3), 90                                                                                                                                                                              | 103.620(2), 107.057(3),<br>98.424(2)                                                                                                                                                                                                                                                          |
| Volume, Å <sup>3</sup>                                     | 7371.6(8)                                                                                                                                                                                      | 8180.5(7)                                                                                                                                                                                                                                                                                     |
| <i>Z</i>                                                   | 2                                                                                                                                                                                              | 1                                                                                                                                                                                                                                                                                             |
| Density (calculated),<br>g/cm <sup>3</sup>                 | 1.917                                                                                                                                                                                          | 1.616                                                                                                                                                                                                                                                                                         |
| μ, mm <sup>-1</sup>                                        | 2.697                                                                                                                                                                                          | 1.685                                                                                                                                                                                                                                                                                         |
| Crystal size, mm                                           | 0.4 × 0.2 × 0.08                                                                                                                                                                               | 0.4 × 0.2 × 0.06                                                                                                                                                                                                                                                                              |
| Radiation, λ, Å                                            | MoKα, 0.71073                                                                                                                                                                                  | MoKα, 0.71073                                                                                                                                                                                                                                                                                 |
| Data collection range, θ, °                                | 4.082 – 27.499                                                                                                                                                                                 | 4.085 – 27.499                                                                                                                                                                                                                                                                                |

|                                            |                                                                               |                                                                    |
|--------------------------------------------|-------------------------------------------------------------------------------|--------------------------------------------------------------------|
| Index ranges                               | $-15 \leq h \leq 14, -27 \leq k \leq 27, -38 \leq l \leq 37$                  | $-26 \leq h \leq 26, -26 \leq k \leq 26, -28 \leq l \leq 28$       |
| Reflections collected                      | 66689                                                                         | 62272                                                              |
| Unique reflections/ $R_{\text{int}}$       | 16876/0.0392                                                                  | 28666/0.1055                                                       |
| Reflections with $I > 2\sigma(I)$          | 13166                                                                         | 12659                                                              |
| Data/restraints/parameters                 | 16876/0/871                                                                   | 28666/1402/1932                                                    |
| Goodness-of-fit on $F^2$                   | 1.021                                                                         | 0.941                                                              |
| Weight scheme                              | $w = 1/[\sigma^2(F_o^2) + (0.0260P)^2 + 25.6363P]$ where $P=(F_o^2+2F_c^2)/3$ | $w = 1/[\sigma^2(F_o^2) + (0.1179P)^2]$ where $P=(F_o^2+2F_c^2)/3$ |
| Final R indexes [ $I \geq 2\sigma(I)$ ]    | $R_1 = 0.0320, wR_2 = 0.0681$                                                 | $R_1 = 0.0717, wR_2 = 0.1719$                                      |
| Final R indexes [all data]                 | $R_1 = 0.0510, wR_2 = 0.0777$                                                 | $R_1 = 0.1936, wR_2 = 0.2503$                                      |
| Largest diff. peak/ hole, $e/\text{\AA}^3$ | 3.14/-1.98                                                                    | 2.76/-1.61                                                         |

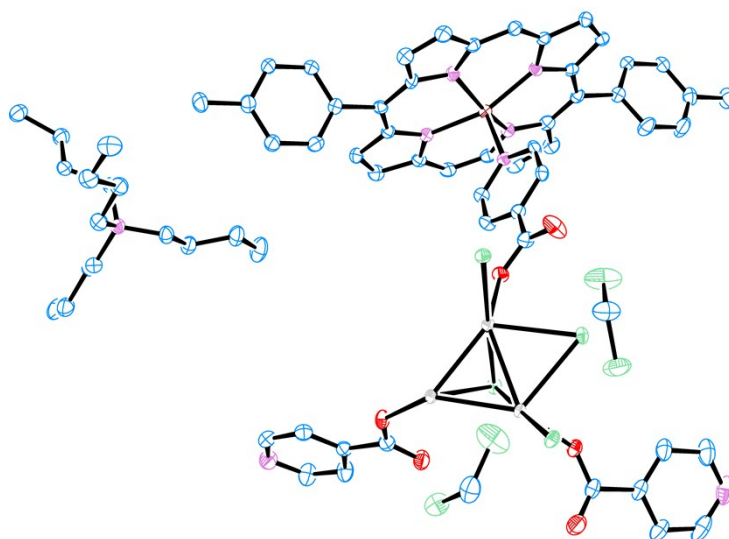

Fig. S5 ORTEP drawing of asymmetric unit of **CP<sub>2</sub>**. Thermal ellipsoids are at the 50% probability level. Hydrogen atoms are omitted for clarity. C atoms are marked by blue, N by magenta, O by red, Cl and I by green, Zn by dark-red, Mo by grey.



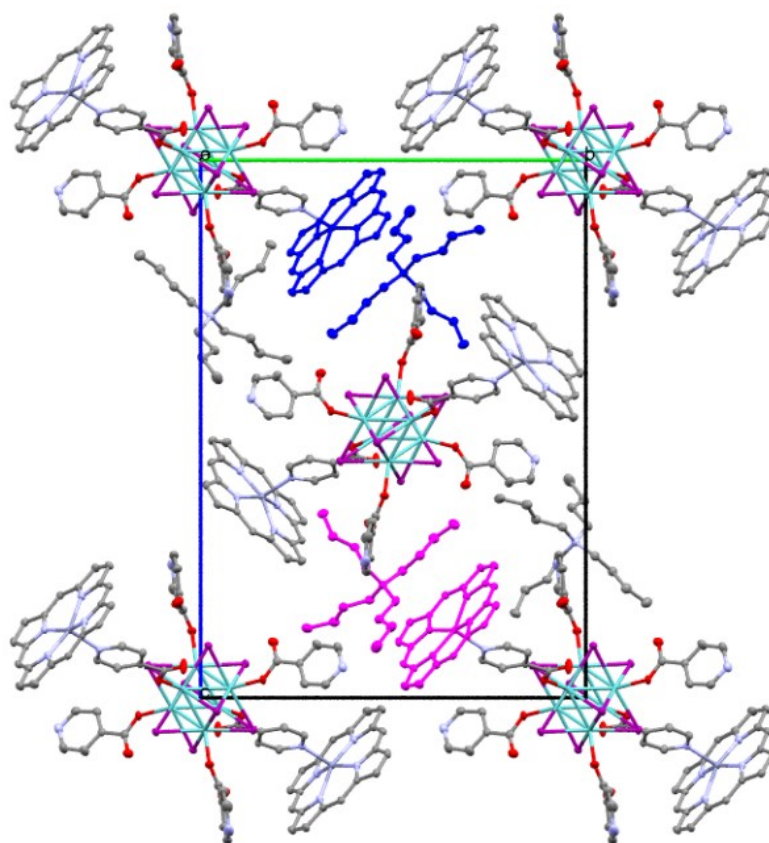

Fig. S6 Packing of **CP<sub>2</sub>**. Hydrogen atoms and solvent molecules CH<sub>2</sub>Cl<sub>2</sub> are omitted for clarity. Ellipsoids are at the 50% probability level.

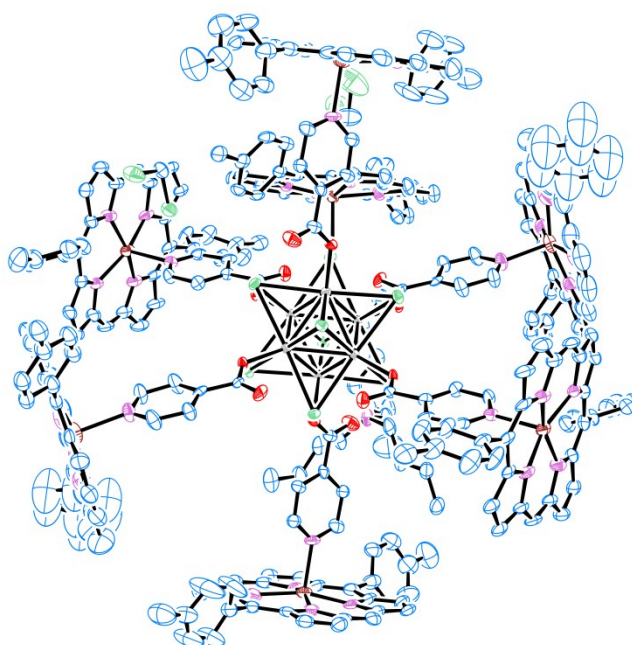

Fig. S7 ORTEP drawing of **CP<sub>6</sub>**. Thermal ellipsoids are at the 30% probability level. Hydrogen atoms are omitted for clarity. C atoms are marked by blue, N by magenta, O by red, Cl and I by green, Zn by dark-red, Mo by grey.

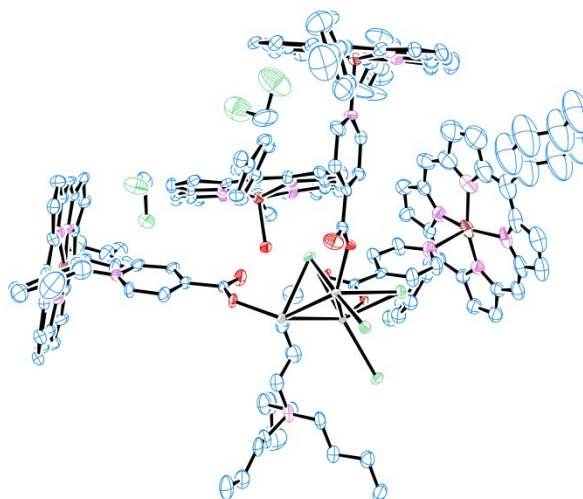

Fig. S8 ORTEP drawing of asymmetric unit of **CP<sub>6</sub>**. Thermal ellipsoids are at the 30% probability level. Hydrogen atoms are omitted for clarity. C atoms are marked by blue, N by magenta, O by red, Cl and I by green, Zn by dark-red, Mo by grey.

Table S6 Geometry of Mo cluster complexes.

| Complex                                       | Mo–Mo                     | Mo– $\mu_3$ -I            | Mo–L                                                        | Ref          |
|-----------------------------------------------|---------------------------|---------------------------|-------------------------------------------------------------|--------------|
| $[\{\text{Mo}_6(\mu_3\text{-I})_8\}L_6]^{2-}$ | 2.6599(7)–<br>2.6725(8)   | 2.7642(7)–<br>2.8057(7)   | $L = \text{C}_6\text{H}_5\text{COO};$<br>2.097(4)           | <sup>1</sup> |
| <b>PyMoC</b>                                  | 2.6652(4)–<br>2.6738(4)   | 2.7630(4)–<br>2.8067(4)   | $L = \text{C}_5\text{NH}_4\text{COO};$<br>2.119(3)–2.168(3) | This<br>work |
| <b>CP<sub>2</sub></b>                         | 2.6570(5)–<br>2.6774(5)   | 2.7728(5)–<br>2.7937(5)   | $L = \text{C}_5\text{NH}_4\text{COO};$<br>2.110(3)–2.136(3) | This<br>work |
| <b>CP<sub>6</sub></b>                         | 2.6625(14)–<br>2.6707(16) | 2.7570(13)–<br>2.8031(14) | $L = \text{C}_5\text{NH}_4\text{COO};$<br>2.092(8)–2.102(8) | This<br>work |

Table S7 Selected bond lengths (Å) and angles (°) for the hybrid supramolecular complexes **CP<sub>n</sub>**.

|                          | Zn–N(por),<br>Å                                                                          | Zn–N(py),<br>Å        | Zn–N <sub>4</sub><br>deviatio<br>n, Å | Maximum C <sub><math>\beta</math></sub><br>deviation from<br>N <sub>4</sub> , Å | Dihedra<br>l angles<br>N <sub>4</sub> /N <sub>4</sub> <sup>2</sup> , ° | Dihedral angles<br>C <sub>6</sub> H <sub>4</sub> (tolyl)/N <sub>4</sub> , ° |
|--------------------------|------------------------------------------------------------------------------------------|-----------------------|---------------------------------------|---------------------------------------------------------------------------------|------------------------------------------------------------------------|-----------------------------------------------------------------------------|
| <b>CP<sub>2</sub></b>    | Zn1–N14<br>2.073(3)<br>Zn1–N13<br>2.070(3)<br>Zn1–N12<br>2.086(3)<br>Zn1–N15<br>2.074(3) | Zn1–N11<br>2.155(3)   | Zn1<br>0.383(2)                       | C103 -0.206(7)<br>C108 0.137(7)<br>C120 0.203(7)<br>C124 0.278(7)               |                                                                        | 60.8<br>78.0                                                                |
| <b>CP<sub>6</sub>_sq</b> | Zn11–N14<br>2.045(14)<br>Zn11–N12<br>2.062(15)<br>Zn11–N13<br>2.097(13)                  | Zn11–N11<br>2.137(11) | Zn11<br>0.293(6)                      | C102 0.233(25)<br>C108 0.050(25)<br>C119 0.251(23)<br>C124 -0.121(25)           | 85.4<br>(por 1-2)<br><br>47.7<br>(por 1-3)                             | 80.6<br>60.6                                                                |

|                                                                           |                                                                                                  |                                   |                  |                                                                         |                   |              |
|---------------------------------------------------------------------------|--------------------------------------------------------------------------------------------------|-----------------------------------|------------------|-------------------------------------------------------------------------|-------------------|--------------|
|                                                                           | Zn11–N15<br>2.074(13)                                                                            |                                   |                  |                                                                         | 63.3<br>(por 2-3) |              |
|                                                                           | Zn21–N25<br>2.051(16)<br>Zn21–N23<br>2.043(14)<br>Zn21–N22<br>2.036(15)<br>Zn21–N24<br>2.068(16) | Zn21–N21<br>2.136(11)             | Zn21<br>0.282(7) | C202 -0.151(25)<br>C208 -0.008(26)<br>C219 0.030(31)<br>C225 -0.042(27) |                   | 72.1<br>68.6 |
|                                                                           | Zn31–N34<br>2.073(18)<br>Zn31–N32<br>2.044(15)<br>Zn31–N33<br>2.037(17)<br>Zn31–N35<br>2.057(15) | Zn31–N31<br>2.152(13)             | Zn31<br>0.312(8) | C302 0.114(30)<br>C307 -0.236(33)<br>C319 0.154(51)<br>C325 -0.065(30)  |                   | 69.6<br>61.8 |
| <b>CP<sub>6</sub>_sq</b><br>Zn<br>porphyrin<br>not bonded<br>with cluster | Zn41–N43<br>2.055(12)<br>Zn41–N42<br>2.064(11)<br>Zn41–N41<br>2.084(13)<br>Zn41–N44<br>2.085(12) | Zn41–O41 <sup>1</sup><br>2.081(8) | Zn41<br>0.348(6) | C402 0.113(27)<br>C408 0.058(23)<br>C419 0.177(23)<br>C425 0.230(23)    |                   | 58.3<br>66.2 |

<sup>1</sup>H<sub>2</sub>O molecule axially coordinated to Zn(II) porphyrin not bonded with cluster

<sup>2</sup> Dihedral angles between symmetrically independent porphyrin molecules.

### 3. Powder X-ray diffraction analysis (PXRD)

a)

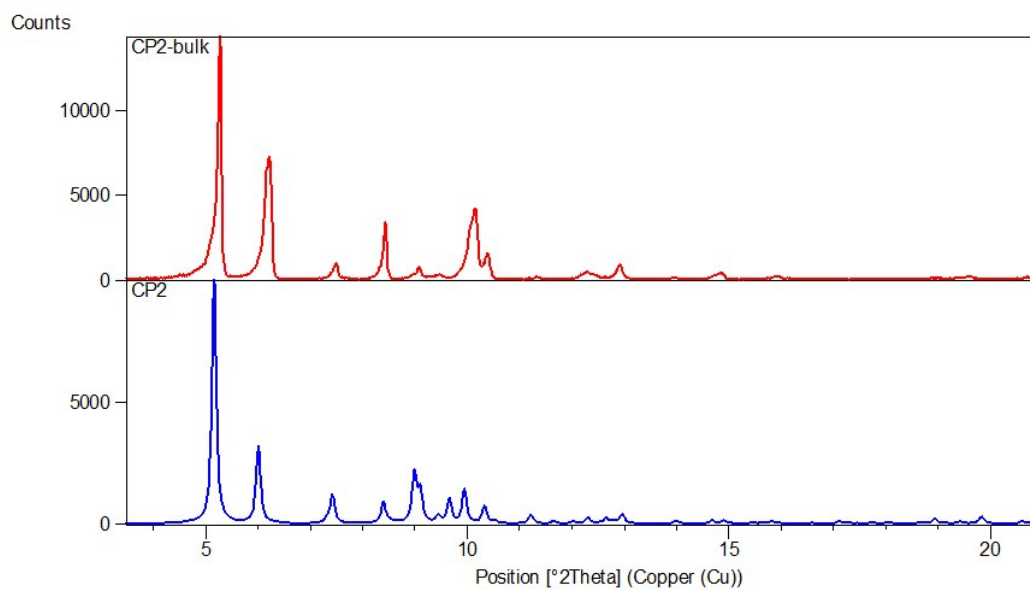

b)

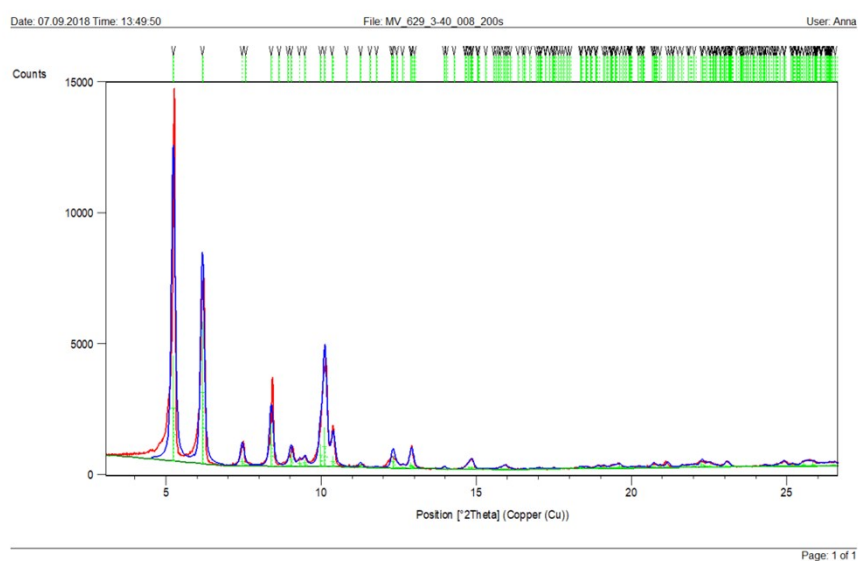

Fig. S9 PXRD pattern of **CP<sub>2</sub>-bulk** a) Comparison of PXRD pattern of **CP<sub>2</sub>-bulk** (red) with theoretical powder pattern calculated in Mercury from single crystal data for **CP<sub>2</sub>** (blue), b) The result of the Le-bail fit of **CP<sub>2</sub>-bulk**.

a)

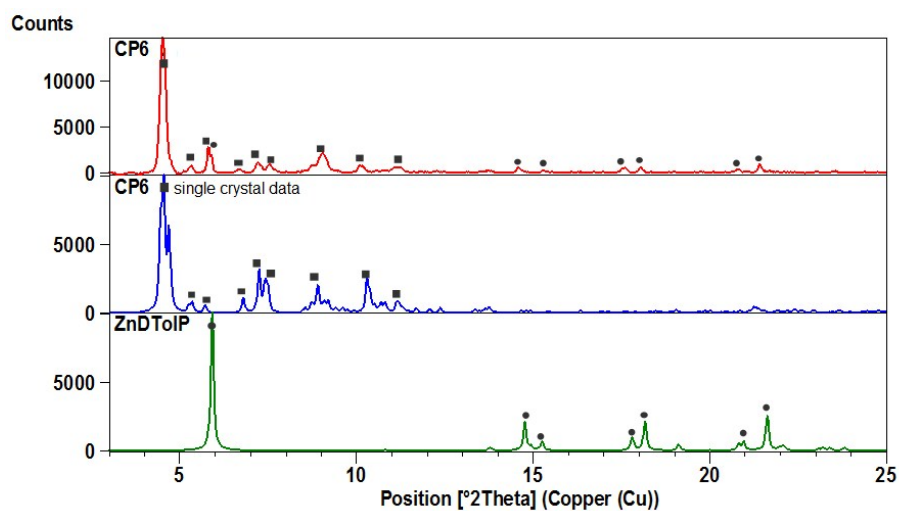

b)

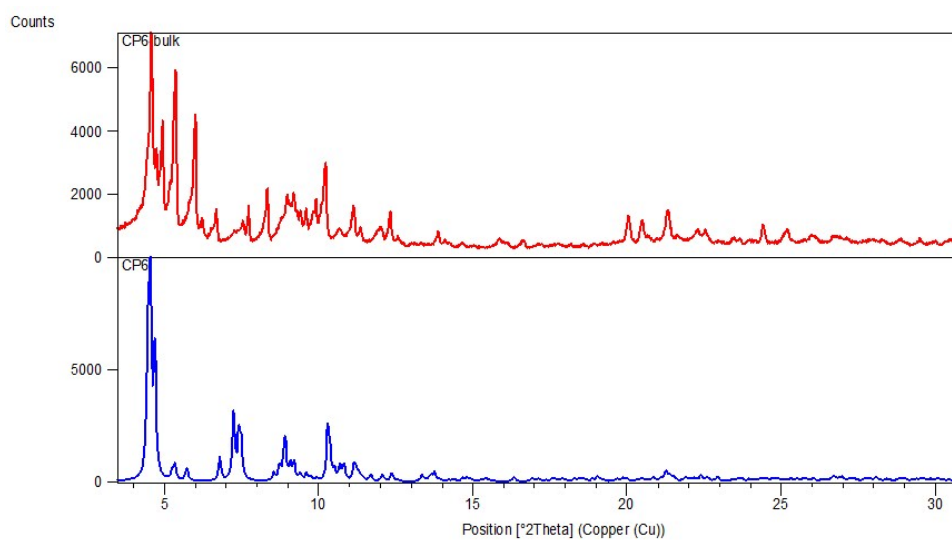

Fig. S10 PXRd pattern of  $\text{CP}_6$ . a) PXRd pattern of  $\text{CP}_6$  sample from single crystal synthesis (red) compared with theoretical powder pattern for  $\text{CP}_6$  single crystal data (blue) and theoretical powder pattern for  $\text{ZnDTolP}$  single crystal (green), b) comparison of PXRd pattern of  $\text{CP}_6$ -bulk (red) with theoretical powder pattern calculated in Mercury from single crystal data for  $\text{CP}_6$  (blue). The main phase is  $\text{CP}_6$  but it is not pure.

## 4. NMR spectroscopy

### 4.1. DOSY Experiments

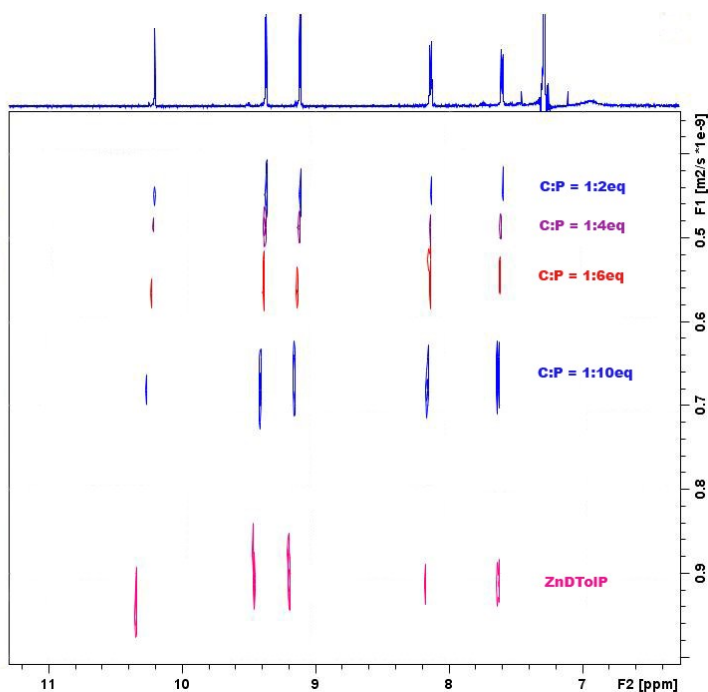

(A)

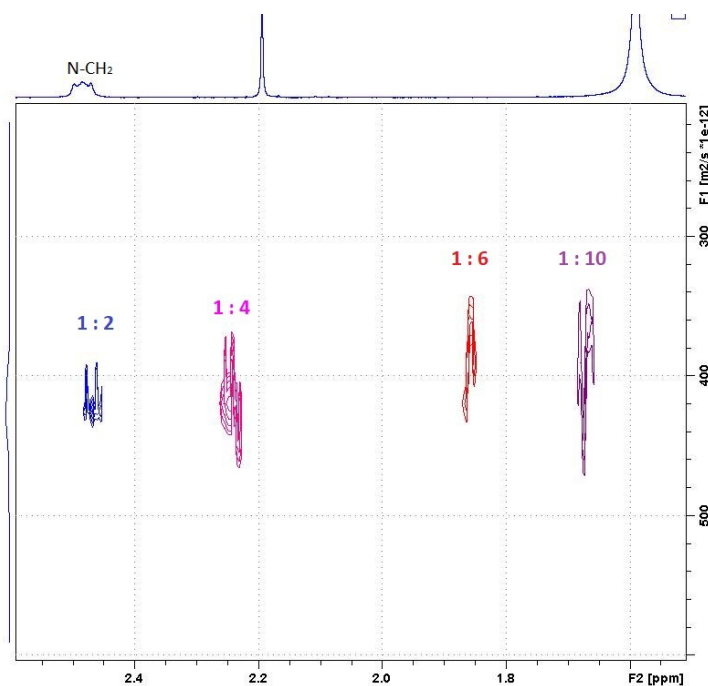

(B)

Fig. S11 DOSY  $^1\text{H}$  NMR spectra (in  $\text{CDCl}_3$  at 303 K) of **ZnDTolP**, **PyMoC** and their mixtures at different molar ratios (C : P = 1:2 – 1:10): (A) the porphyrin spectral range and (B) the range of the  $\text{N-CH}_2$  group of  $\text{Bu}_4\text{N}^+$  (see Fig. 4).

Table S8 (Left) Experimental diffusion coefficients ( $D_s$ ) of **ZnDTolP**, **PyMoC** and their mixtures at different molar ratios (C : P = 1:2 – 1:10) according DOSY-NMR data. (Right) Changes of  $D_s$  at the different molar ratios (C : P = 1:2 – 1:10) in  $\text{CDCl}_3$ .

| C:P ratio                          | $D_s, \text{m}^2/\text{s}$<br>Porph/Py* | $D_s, \text{m}^2/\text{s}$<br>Bu <sub>4</sub> N <sup>+</sup> ** |
|------------------------------------|-----------------------------------------|-----------------------------------------------------------------|
| <b>0 : 1</b><br>( <b>ZnDTolP</b> ) | $8.88 \times 10^{-10}$                  |                                                                 |
| <b>1 : 0</b><br>( <b>PyMoC</b> )   | $4.63 \times 10^{-10}$                  | $4.65 \times 10^{-10}$                                          |
| <b>1 : 2</b>                       | $4.11 \times 10^{-10}$                  | $4.11 \times 10^{-10}$                                          |
| <b>1 : 4</b>                       | $4.46 \times 10^{-10}$                  | $4.05 \times 10^{-10}$                                          |
| <b>1 : 6</b>                       | $5.0 \times 10^{-10}$                   | $3.84 \times 10^{-10}$                                          |
| <b>1 : 10</b>                      | $6.2 \times 10^{-10}$                   | $3.83 \times 10^{-10}$                                          |

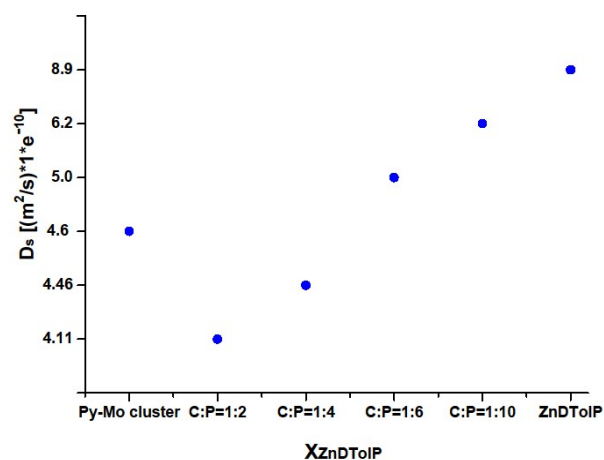

\* The average of the  $D_s$  values determined for the five signal of the porphyrin core.

\*\* The  $D_s$  value determined for the N-CH<sub>2</sub> signal of the Bu<sub>4</sub>N<sup>+</sup> cation.

#### 4.2. Low-temperature NMR Experiments

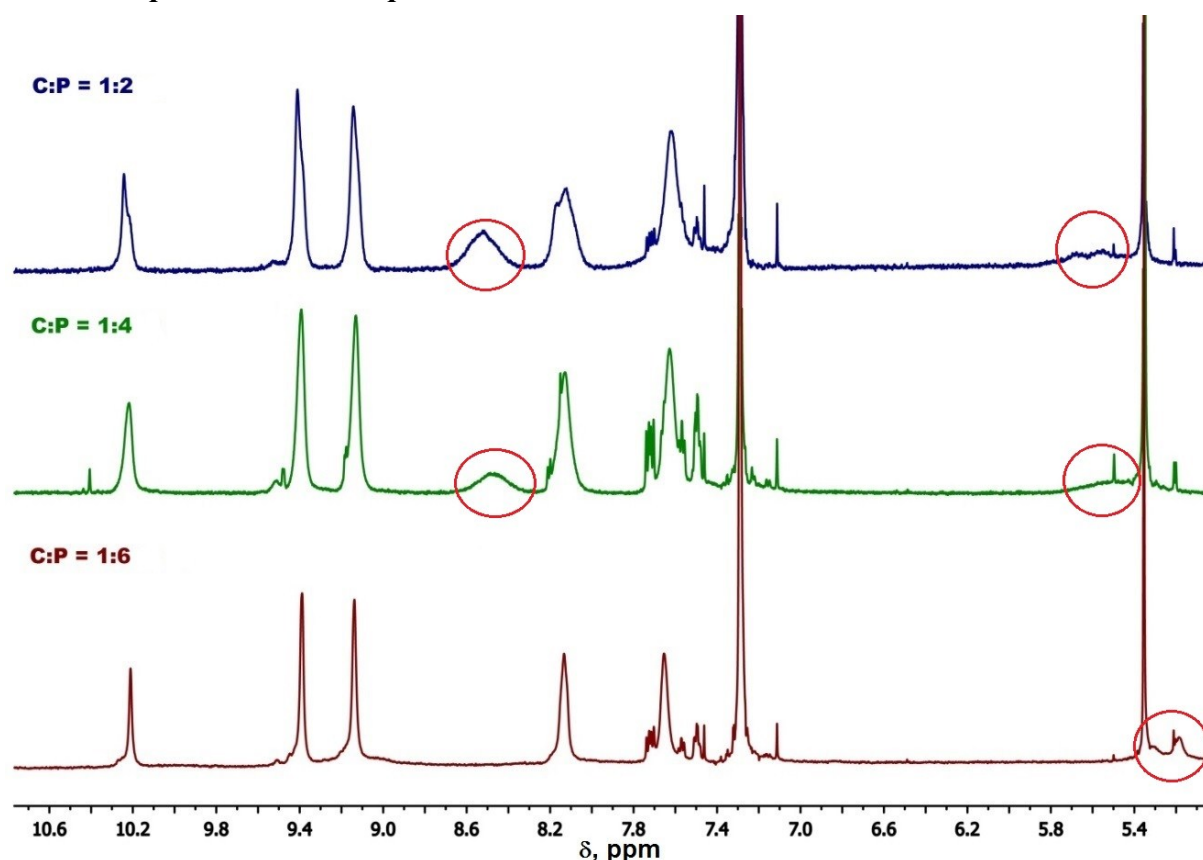

Fig. S12 Low-temperature <sup>1</sup>H NMR spectra (in  $\text{CDCl}_3$  at 233 K) of mixtures of **ZnDTolP** and **PyMoC** at different cluster : porphyrin molar ratios (C : P = 1:2 – 1:6).

## 5. UV-Vis spectroscopy

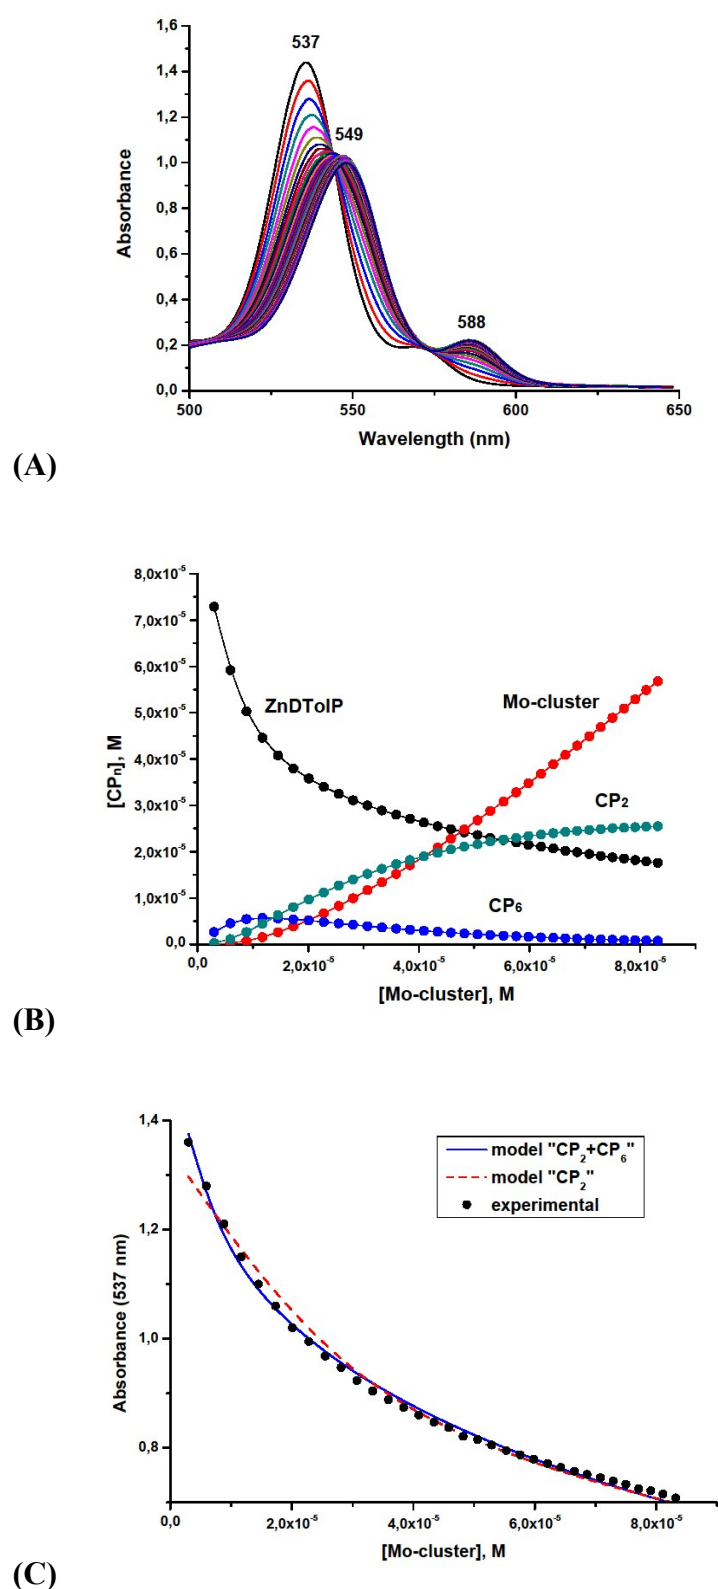

Fig. S13 (A) UV-Vis spectral changes at 298 K of **ZnDTolP** (90 μM) in CH<sub>2</sub>Cl<sub>2</sub> upon titration with **PyMoC** solution (0.034 equiv each addition). (B) Species concentration plot of **ZnDTolP** (black), hybrid complex **CP<sub>2</sub>** (aquamarine) and hybrid complex **CP<sub>6</sub>** (blue) upon the addition of **PyMoC**. (C) Absorbance changes of **ZnDTolP** at 537 nm upon the addition of **PyMoC**.
